# Supplementary material for: Evaluating and comparing the signalling and functional landscape of iPSC- CMs derived from patients with dilated cardiomyopathy
Source: Research Square preprint supplement (doi:10.21203/rs.3.rs-8633189/v1), 2026-01-30
Supplement: Supplementary file 1 [file d6728125c95198c86fe4e651.pdf]

## Supplementary Figure legends

**Supplementary Figure 1. Validation of iPSC lines derived from patient blood mononuclear cells for DCM Patient 1.** A) Immunofluorescence with pluripotency markers (left to right: Nanog, OCT4, SSEA-4 and TRA-1-60). B) Trilineage differentiation potential demonstrated with immunofluorescence for mesoderm, ectoderm and endoderm (left to right: Brachyury, Otx2 and Sox17). C) Quantified gene expression of pluripotency markers using RT-PCR in iPSCs vs. cardiomyocytes derived from iPSCs. D) Karyotyping showing normal chromosome number.

**Supplementary Figure 2. Validation of iPSC lines derived from patient blood mononuclear cells for Control Subject 2.** A) Immunofluorescence with pluripotency markers (left to right: Nanog, OCT4, SSEA-4 and TRA-1-60). B) Trilineage differentiation potential demonstrated with immunofluorescence for mesoderm, ectoderm and endoderm (left to right: Brachyury, Otx2 and Sox17). C) Quantified gene expression of pluripotency markers using RT-PCR in iPSCs vs. cardiomyocytes derived from iPSCs. D) Karyotyping showing normal chromosome number.

**Supplementary Figure 3. Validation of iPSC lines derived from patient blood mononuclear cells for DCM Patient 2.** A) Immunofluorescence with pluripotency markers (left to right: Nanog, OCT4, SSEA-4 and TRA-1-60). B) Trilineage differentiation potential demonstrated with immunofluorescence for mesoderm, ectoderm and endoderm (left to right: Brachyury, Otx2 and Sox17). C) Quantified gene expression of pluripotency markers using RT-PCR in iPSCs vs. cardiomyocytes derived from iPSCs. D) Karyotyping showing normal chromosome number.

**Supplementary Figure 4. Clustering single cells into sub populations based on response levels of nuclear PKA.** Pharmacological agents: Ang II: angiotensin II (1  $\mu$ M); SI (10  $\mu$ M); SII (10  $\mu$ M); iso: isoproterenol (10  $\mu$ M); nor: norepinephrine (10  $\mu$ M); epi: epinephrine (10  $\mu$ M); phen: phenylephrine (10  $\mu$ M); carv: carvedilol (1  $\mu$ M), ET-1: endothelin-1 (100 nM); fors: Forskolin (5  $\mu$ M); PMA (1  $\mu$ M); in healthy controls and dilated cardiomyopathy patients. Left panels: Response clusters generated per subject; right panels: percent of cells within each cluster. Water, acetic acid and ascorbic acid were vehicles for Ang II ligands, ET-1 and adrenergic receptor ligands.

**Supplementary Figure 5. Clustering single cells into sub populations based on response levels of cytoplasmic ERK.** Pharmacological agents: Ang II: angiotensin II (1  $\mu$ M); SI (10  $\mu$ M); SII (10  $\mu$ M); iso: isoproterenol (10  $\mu$ M); nor: norepinephrine (10  $\mu$ M); epi: epinephrine (10  $\mu$ M); phen: phenylephrine (10  $\mu$ M); carv: carvedilol (1  $\mu$ M), ET-1: endothelin-1 (100 nM); fors: Forskolin (5  $\mu$ M); PMA (1  $\mu$ M); in healthy controls and dilated cardiomyopathy patients. Left panels: Response clusters generated per subject; right panels: percent of cells within each cluster. Water, acetic acid and ascorbic acid were vehicles for Ang II ligands, ET-1 and adrenergic receptor ligands.

**Supplementary Figure 6. Clustering single cells into sub populations based on response levels of nuclear ERK.** Pharmacological agents: Ang II: angiotensin II (1  $\mu$ M); SI (10  $\mu$ M); SII (10  $\mu$ M); iso: isoproterenol (10  $\mu$ M); nor: norepinephrine (10  $\mu$ M); epi: epinephrine (10  $\mu$ M); phen: phenylephrine (10  $\mu$ M); carv: carvedilol (1  $\mu$ M), ET-1: endothelin-1 (100 nM); fors: Forskolin (5

$\mu\text{M}$ ); PMA ( $1\ \mu\text{M}$ ); in healthy controls and dilated cardiomyopathy patients. Left panels: Response clusters generated per subject; right panels: percent of cells within each cluster. Water, acetic acid and ascorbic acid were vehicles for Ang II ligands, ET-1 and adrenergic receptor ligands.

**Supplementary Figure 7. Tracking differences in calcium handling in hiPSC-CMs between healthy control subjects and patients with dilated cardiomyopathy.** Calcium handling features with and without treatment with  $10\ \mu\text{M}$  isoproterenol. Features shown: Time to 50% peak (s), Time to 90% peak (s), Inter event interval (s), Decay tau (s). Values are expressed as mean  $\pm$  SEM (\* $p \leq 0.05$ , paired t-test,  $n=3$  per subject).
